# Supplementary material for: The Therapeutic Treatment with the GAG-Binding Chemokine Fragment CXCL9(74–103) Attenuates Neutrophilic Inflammation and Lung Dysfunction during Klebsiella pneumoniae Infection in Mice
Source: MDPI journal article supplement (doi:10.3390/ijms23116246), 2022-06-02
Supplement: s1 [file s1]

### Supplementary material:

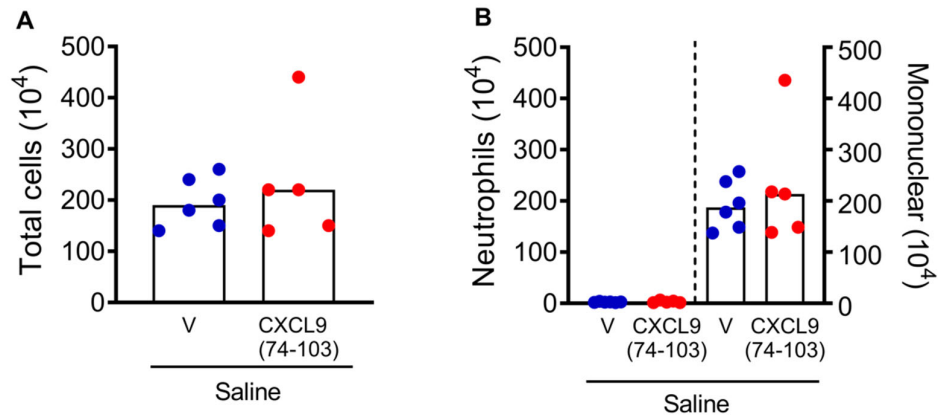

Figure S1: The treatment with CXCL9(74-103) has no effect on cell recruitment to airways in mice injected with saline. Mice received intratracheal injection of saline and after 6 hours mice were treated intravenously with 100  $\mu$ L of CXCL9(74-103) 1mg/mL or vehicle (PBS). Mice were euthanized 24 hours after intratracheal challenge and (A) number of total leukocytes, (B) neutrophils and mononuclear cells was evaluated in BALF. Blue points= vehicle; red points= CXCL9 (74-103). Data are shown as median from one representative experiment; n= 6-5 mice per group.
